# Supplementary material for: Whole Exome Sequencing of 23 Multigeneration Idiopathic Scoliosis Families Reveals Enrichments in Cytoskeletal Variants, Suggests Highly Polygenic Disease
Source: MDPI journal article supplement (doi:10.3390/genes12060922), 2021-06-16
Supplement: s1 [file s1]

## Supplemental File 2

**Supplemental Table 1:** Clinical characteristics of probands and family members whose samples were used for exome sequencing. Probands are indicated by an \* beside their pedigree ID (not all probands were exome sequenced). Pedigrees are provided in **Supplemental File 1**. Curve pattern abbreviations are as follows: RT or LT= Right/Left thoracic, RTL or LTL= Right/Left Thoracolumbar RL or LL= Right/Left Lumbar. Scoliosis curves are provided in degrees along with the vertebral site of their curve apex. Subjects with double curves have measurements and apex sites for both major and minor curves provided.

| <b>Pedigree ID</b> | <b>Sex</b> | <b>Relationship to Proband</b> | <b>Curve Pattern</b> | <b>Curve (Apex)</b> | <b>Surgery/Bracing</b> |
|--------------------|------------|--------------------------------|----------------------|---------------------|------------------------|
| A-III:1            | F          | Sister                         | RT                   | 18° (T8)            | No                     |
| A-II:2             | M          | Uncle (maternal)               | RT                   | 35° (T8)            | No                     |
| A-III:3*           | F          | Self                           | RT                   | 50° (T8)            | Surgery                |
| A-I:2              | F          | Grandmother (maternal)         | RT                   | 20° (T8)            | No                     |
| A-II:4             | F          | Aunt (maternal)                | Unknown              | Unknown curvature   | No                     |
| B-III:5*           | F          | Self                           | RT/ LTL              | 36/54° (T7/T12-L1)  | Brace/Surgery          |
| B-I:2              | F          | Grandmother (paternal)         | RTL                  | 24° (T12-L1)        | No                     |
| B-II:3             | F          | Aunt (paternal)                | RT                   | 50° (T8)            | Surgery                |
| B-III:1            | M          | Cousin (paternal)              | RT                   | 24°                 | No                     |
| C-III:2            | F          | Niece                          | RT                   | 35° (T8)            | No                     |
| C-III:3            | M          | Son                            | RT/ LL               | 62/48° (T8/L2)      | Surgery                |
| C-III:1            | F          | Niece                          | RT                   | 34° (T8)            | No                     |
| D-III:2*           | F          | Self                           | RT/ LL               | 50/35° (T8/L2)      | Brace/Surgery          |
| D-I:1              | M          | Grandfather (maternal)         | RT                   | 25° (T8)            | No                     |
| D-III:4            | F          | Sister                         | Unknown              | 38°                 | Surgery                |
| D-IV:3             | F          | Niece                          | Unknown              | Unknown curvature   | Brace/Surgery          |
| E-II:2*            | F          | Self                           | RT/ LL               | 70/78° (T8/L2)      | No                     |
| E-I:2              | F          | Mother                         | LTL                  | 45° (L1)            | No                     |
| E-III:4            | F          | Niece                          | Unknown              | 50°                 | No                     |
| E-III:5            | F          | Niece                          | RT                   | 15° (T8)            | No                     |
| F-III:1            | M          | Uncle (maternal)               | LL                   | 14° (L2)            | No                     |
| F-IV:1*            | F          | Self                           | LT/ RT               | 36/51° (T4/T9)      | Surgery                |
| F-III:6            | F          | Cousin once removed (maternal) | Unknown              | 22°                 | No                     |
| F-IV:3             | M          | Second cousin                  | Unknown              | 20°                 | No                     |
| G-III:1            | F          | Daughter                       | Unknown              | 32/25°              | Brace                  |
| G-III:3            | F          | Daughter                       | RT/ LTL              | 30/25° (T8/L1)      | Brace                  |
| G-III:2            | M          | Son                            | LL                   | 19° (L2)            | No                     |
| G-I:2              | F          | Mother                         | Unknown              | 25°                 | No                     |
| G-II:1             | M          | Brother                        | Unknown              | 25°                 | No                     |
| H-II:6             | F          | Sister                         | LL                   | 47° (L2)            | Surgery                |
| H-I:2              | F          | Mother                         | RT                   | 15° (T8)            | No                     |
| H-III:4            | F          | Daughter                       | LTL                  | 10° (L1)            | Brace                  |
| H-III:3            | F          | Niece                          | RTL                  | 20° (T12)           | No                     |
| I-II:8*            | F          | Self                           | RT/ LL               | 82/35° (T8/L2)      | Surgery                |
| I-III:5            | F          | Niece                          | Unknown              | 60°                 | Surgery                |
| I-IV:1             | F          | Grand Niece                    | RT/ LTL              | 14/18° (T8/L2)      | No                     |
| J-III:4*           | F          | Self                           | RT/ LL               | 35° (T8)            | Brace/Surgery          |
| J-III:2            | F          | Cousin (maternal)              | Unknown              | 50°                 | Brace/Surgery          |
| J-III:3            | M          | Brother                        | RT                   | 14° (T11)           | No                     |
| J-III:5            | F          | Sister                         | RT/ LTL              | 18/13° (T8/L1)      | No                     |
| K-II:2             | F          | Sister                         | Unknown              | 15°                 | No                     |

|          |   |                                |         |                      |               |
|----------|---|--------------------------------|---------|----------------------|---------------|
| K-II:1   | F | Sister                         | RT/ LL  | 20/50° (T8/L2)       | Surgery       |
| K-III:1  | M | Son                            | LT      | 50° (T8)             | Brace         |
| K-III:3  | M | Son                            | RT/ LL  | 30/21° (T9/L3)       | Brace         |
| L-II:3*  | F | Self                           | RT/ LL  | 68/53° (T9/L2)       | Surgery       |
| L-IV:2   | F | Grand Niece                    | LTL     | 20° (T12)            | Brace         |
| L-IV:3   | F | Grand Niece                    | LL      | 30°                  | No            |
| M-III:3  | F | Niece                          | RT      | 35° (T8)             | No            |
| M-I:2    | F | Mother                         | RL      | 30° (L3)             | No            |
| M-II:6*  | F | Self                           | LL      | 61° (L1-L2)          | Surgery       |
| M-III:5  | F | Niece                          | RT      | 18° (T9-T10)         | No            |
| N-III:2  | F | Daughter                       | RT/ LTL | 30/27° (T7/T12-L1)   | Brace         |
| N-III:6  | M | Nephew                         | LT/ RT  | 13/11° (T2-T3/T5-T6) | No            |
| N-III:1  | M | Son                            | RT      | 20° (T6)             | No            |
| O-IV:1   | F | Second cousin                  | RT/ LL  | 50/35° (T8-T9/L2)    | Brace/Surgery |
| O-IV:3   | F | Sister                         | RT      | 57° (T9-T10)         | Brace/Surgery |
| O-IV:2*  | F | Self                           | RT/ LTL | 20/16° (T8-T9/L1)    | Brace         |
| P-II:2*  | F | Self                           | RT/ LL  | 82/67° (T9/L2)       | No            |
| P-III:2  | F | Niece                          | LT/ RT  | 36/16° (T3/T8-T9)    | No            |
| P-II:6   | F | Sister                         | LL      | 17° (L1-L2)          | No            |
| P-II:7   | F | Sister                         | Unknown | 50°                  | Brace/Surgery |
| Q-III:5* | F | Self                           | RT/ LL  | 70/66° (T8/L2)       | Surgery       |
| Q-I:2    | F | Grandmother (paternal)         | LTL     | 14° (T12-L1)         | No            |
| Q-III:2  | M | Cousin (paternal)              | LL      | 15° (L2-L3)          | No            |
| R-III:1  | M | Son                            | Unknown | 35°                  | No            |
| R-II:2*  | F | Self                           | RT/ LTL | 37/47° (T8/L1-L2)    | No            |
| R-III:2  | M | Son                            | RT      | 22° (T8-T9)          | No            |
| R-III:5  | M | Son                            | RT      | 48° (T9-T10)         | Brace/Surgery |
| R-IV:2   | M | Grandson                       | RT/ LTL | 32/24° (T9/L2)       | No            |
| S-II:2*  | F | Self                           | RT/ LL  | 45/56° (T8/L2)       | Surgery       |
| S-III:2  | F | Niece                          | LT/ RT  | 20/12° (T4-T5/T10)   | No            |
| S-III:3  | F | Niece                          | LTL     | 22° (T12-L1)         | No            |
| S-I:2    | F | Mother                         | RL      | 65° (L2)             | No            |
| T-III:4* | F | Self                           | RT/ LL  | 128/52° (T6/L1-L2)   | No            |
| T-III:5  | M | Brother                        | RT      | 28° (T9-T10)         | No            |
| T-III:2  | F | Cousin (maternal)              | RTL     | 40°                  | Brace         |
| U-III:2  | F | Mother                         | RT/ LL  | 44/38° (T7-T8/L2)    | Surgery       |
| U-IV:4   | F | Cousin (maternal)              | RT/ LTL | 15/15° (T8/L1)       | No            |
| U-III:5  | F | Aunt (maternal)                | Unknown | 20°                  | No            |
| U-III:7  | F | Cousin once removed (maternal) | Unknown | Unknown curvature    | No            |
| V-I:2    | F | Grandmother (maternal)         | LL      | 19° (L2-L3)          | No            |
| V-III:4* | F | Self                           | RT/ LTL | 42/46° (T8/L1-L2)    | Brace         |
| V-III:1  | F | Cousin (maternal)              | RTL     | 25° (L1)             | No            |
| W-III:3* | F | Self                           | Unknown | 38°                  | No            |
| W-I:2    | F | Grandmother (paternal)         | Unknown | 23°                  | No            |
| W-III:2  | F | Cousin (paternal)              | RT/ LL  | 24/23° (T9/L2-L3)    | No            |

**Supplemental Table 2:** Enriched cytobands from MAF<0.05 input gene list (n= 1161) using DAVID, as described in the methods.

| Term          | Count | %      | p Value | Genes                                                                                                                                                                  | Fold Enrichment | Bonferroni |
|---------------|-------|--------|---------|------------------------------------------------------------------------------------------------------------------------------------------------------------------------|-----------------|------------|
| 16p13.3       | 23    | 2.0070 | 0.0001  | <i>SRRM2, TRAP1, OR2C1, TPSB2, TPSG1, IFT140, ABCA3, TSC2, KREMEN2, PPL, RPL3L, VASN, CACNA1H, SSTR5, LMF1, RAB26, EME2, E4F1, CORO7, FLYWCH1, RGS11, PRR25, MSRB1</i> | 2.6930          | 0.0350     |
| 5q35.2        | 7     | 0.6108 | 0.0016  | <i>RNF44, UNC5A, GPRIN1, FAM153B, CDHR2, HMP19, THOC3</i>                                                                                                              | 5.4784          | 0.6443     |
| 19q13.42      | 8     | 0.6981 | 0.0043  | <i>ZSCAN5B, TARM1, SSC5D, RDH13, KIR2DL1, TMC4, FAM71E2, OSCAR</i>                                                                                                     | 3.9003          | 0.9409     |
| 2q37.3        | 9     | 0.7853 | 0.0054  | <i>FARP2, RTP5, PRR21, NEU4, AQP12A, HDLBP, KIF1A, SCLY, BOK</i>                                                                                                       | 3.3458          | 0.9727     |
| 16q24.3       | 7     | 0.6108 | 0.0093  | <i>ANKRD11, FANCA, PIEZO1, ACSF3, SLC22A31, RNF166, GAS8</i>                                                                                                           | 3.8552          | 0.9979     |
| 15q11.2-q21.3 | 3     | 0.2618 | 0.0105  | <i>JMJD7-PLA2G4B, PLA2G4B, NDUFAF1</i>                                                                                                                                 | 17.8441         | 0.9991     |
| 3q13.2        | 5     | 0.4363 | 0.0136  | <i>TMPRSS7, ABHD10, BOC, SIDT1, SLC9C1</i>                                                                                                                             | 5.3107          | 0.9999     |
| 3q29          | 9     | 0.7853 | 0.0156  | <i>LRRC15, TM4SF19, DLG1, TMEM44, TNK2, ATP13A4, ATP13A3, XXYLT1, MUC4</i>                                                                                             | 2.7881          | 1.0000     |
| 19p13.3       | 16    | 1.3962 | 0.0201  | <i>CFD, SMIM24, KDM4B, MLLT1, ABCA7, ZNF77, MFSD12, ADAMTS10, PCSK4, CNN2, GZMM, PLIN4, TRIP10, FSD1, APBA3, SLC25A23</i>                                              | 1.9343          | 1.0000     |
| 19q13.4       | 8     | 0.6981 | 0.0229  | <i>LENG1, PEG3, KIR3DL1, LILRB1, KIR2DL1, PTPRH, GP6, ZIM2</i>                                                                                                         | 2.8324          | 1.0000     |
| 1q44          | 9     | 0.7853 | 0.0307  | <i>OR2T3, PGBD2, OR1C1, OR14K1, OR2T29, EFCAB2, CEP170, OR2T7, OR14A2</i>                                                                                              | 2.4556          | 1.0000     |
| 1q21          | 9     | 0.7853 | 0.0322  | <i>SPTA1, PIAS3, FAM189B, FCRL2, PGLYRP4, SETDB1, ARNT, ANXA9, MCL1</i>                                                                                                | 2.4333          | 1.0000     |
| 10q26         | 4     | 0.3490 | 0.0362  | <i>PTPRE, CHST15, TACC2, EIF3A</i>                                                                                                                                     | 5.4073          | 1.0000     |
| 19q13.1       | 6     | 0.5236 | 0.0422  | <i>GPI, FCGBP, ITPKC, NPHS1, ZNF527, FFAR3</i>                                                                                                                         | 3.1305          | 1.0000     |
| 11q13         | 9     | 0.7853 | 0.0496  | <i>ESRRA, PLCB3, NDUFS8, NUMA1, SLC02B1, FOLR3, ZFPL1, SIPA1, SPTBN2</i>                                                                                               | 2.2305          | 1.0000     |
| 10q24.33      | 3     | 0.2618 | 0.0507  | <i>PDCD11, SH3PXD2A, INA</i>                                                                                                                                           | 8.1109          | 1.0000     |
| 2p24-p23      | 2     | 0.1745 | 0.0661  | <i>APOB, MATN3</i>                                                                                                                                                     | 29.7401         | 1.0000     |
| 10p12.33      | 3     | 0.2618 | 0.0688  | <i>MRC1, SLC39A12, MALRD1</i>                                                                                                                                          | 6.8631          | 1.0000     |
| 1q23.1        | 5     | 0.4363 | 0.0771  | <i>RGS5, OR6Y1, OR10T2, OR6P1, NES</i>                                                                                                                                 | 3.0979          | 1.0000     |
| 1q32.1        | 8     | 0.6981 | 0.0776  | <i>DSTYK, SLC45A3, ATP2B4, PLEKHA6, SRGAP2, LAX1, IGFN1, CAMSAP2</i>                                                                                                   | 2.1629          | 1.0000     |
| 1q21.3        | 7     | 0.6108 | 0.0932  | <i>KPRP, FLG, ATP8B2, KCNN3, SLC27A3, LCE1E, LCE2D</i>                                                                                                                 | 2.2385          | 1.0000     |

**Supplemental Table 3:** We genotyped specific variants in additional affected and unaffected family members. Variants were selected for validation that were present in multiple families and appeared within enriched functional categories (cytoskeleton and/or extracellular matrix GO Terms). Families containing these variants also had to have additional family members that provided a DNA sample. Ensembl HGVS notation is provided for the splice site variant, indicated with a \*. Families indicated with a “2018-” were previously exome sequenced using a similar pipeline and published by our laboratory (Baschal et al., G3 2018, PMC6071588).

| Gene           | GO Term(s)                                                        | Family | WES <i>n</i> AIS | Variant (HGVS)                                                                                                                       | Genotyping in additional family members<br>(not exome sequenced) |                         |                                |
|----------------|-------------------------------------------------------------------|--------|------------------|--------------------------------------------------------------------------------------------------------------------------------------|------------------------------------------------------------------|-------------------------|--------------------------------|
|                |                                                                   |        |                  |                                                                                                                                      | AIS with variant                                                 | Unaffected with variant | Segregated with AIS phenotype? |
| <b>ANKRD11</b> | <i>Plasma membrane, cytoplasm</i>                                 | C      | 3                | ANKRD11:NM_001256183:exon9:c.C6176A:p.P2059H,ANKRD11:NM_013275:exon9:c.C6176A:p.P2059H,ANKRD11:NM_001256182:exon10:c.C6176A:p.P2059H | 4/4                                                              | 2/3                     | <i>Partially</i>               |
|                |                                                                   | H      | 4                | ANKRD11:NM_001256183:exon9:c.C7022T:p.A2341V,ANKRD11:NM_013275:exon9:c.C7022T:p.A2341V,ANKRD11:NM_001256182:exon10:c.C7022T:p.A2341V | 0/6                                                              | 0/3                     | <i>No</i>                      |
|                |                                                                   | S      | 4                | ANKRD11:NM_001256183:exon9:c.C7022T:p.A2341V,ANKRD11:NM_013275:exon9:c.C7022T:p.A2341V,ANKRD11:NM_001256182:exon10:c.C7022T:p.A2341V | 0/2                                                              | 0/3                     | <i>No</i>                      |
|                |                                                                   | 2018-E | 3                | ANKRD11:NM_001256183:exon9:c.C7106T:p.A2369V,ANKRD11:NM_013275:exon9:c.C7106T:p.A2369V,ANKRD11:NM_001256182:exon10:c.C7106T:p.A2369V | 0/4                                                              | 0/3                     | <i>No</i>                      |
|                |                                                                   | 2018-E | 3                | ANKRD11:NM_001256183:exon9:c.C7061A:p.P2354H,ANKRD11:NM_013275:exon9:c.C7061A:p.P2354H,ANKRD11:NM_001256182:exon10:c.C7061A:p.P2354H | 0/4                                                              | 0/3                     | <i>No</i>                      |
| <b>COL21A1</b> | <i>Proteinaceous extracellular matrix, collagen trimer</i>        | P      | 4                | COL21A1:NM_030820:exon16:c.C1748G:p.P583R                                                                                            | 1/4                                                              | 1/4                     | <i>No</i>                      |
|                |                                                                   | S      | 4                | COL21A1:NM_030820:exon28:c.T2462C:p.L821P                                                                                            | NA                                                               | 2/3                     | <i>No</i>                      |
| <b>COL6A5</b>  | <i>Collagen trimer, collagen catabolic process, cell adhesion</i> | 2018-B | 3                | COL6A5:NM_001278298:exon38:c.A7300G:p.K2434E,COL6A5:NM_153264:exon38:c.A7300G:p.K2434E                                               | 2/5                                                              | 3/7                     | <i>No</i>                      |
|                |                                                                   | C      | 3                | COL6A5:NM_001278298:exon40:c.T7580C:p.L2527P                                                                                         | 0/3                                                              | 2/3                     | <i>No</i>                      |
|                |                                                                   | H      | 4                | COL6A5:NM_001278298:exon3:c.T167C:p.M56T,COL6A5:NM_153264:exon3:c.T167C:p.M56T                                                       | 3/5                                                              | 1/3                     | <i>Partially</i>               |
| <b>FGD1</b>    | <i>Cytoplasm, cytoskeleton, actin cytoskeleton regulation</i>     | E      | 4                | FGD1:NM_004463:exon3:c.G515C:p.R172P                                                                                                 | 0/4                                                              | 0/3                     | <i>No</i>                      |
|                |                                                                   | J      | 4                | FGD1:NM_004463:exon3:c.G515C:p.R172P                                                                                                 | 0/2                                                              | N/A                     | <i>No</i>                      |
| <b>NPHP4</b>   | <i>Cytoskeleton, centrosome, actin cytoskeleton organization</i>  | 2018-A | 4                | NPHP4:NM_001291594:exon13:c.G683A:p.R228H,NPHP4:NM_001291593:exon14:c.G680A:p.R227H,NPHP4:NM_015102:exon17:c.G2219A:p.R740H          | 2/4                                                              | 1/5                     | <i>Partially</i>               |
|                |                                                                   | O      | 3                | *NPHP4:ENST00000378156:exon20:c.2818-2A>T:NA                                                                                         | NA                                                               | 1/2                     | <i>Unknown</i>                 |
|                |                                                                   | W      | 3                | NPHP4:NM_001291594:exon15:c.C1006T:p.R336W,NPHP4:NM_001291593:exon16:c.C1003T:p.R335W,NPHP4:NM_015102:exon19:c.C2542T:p.R848W        | 1/2                                                              | 3/5                     | <i>No</i>                      |
| <b>OBSCN</b>   | <i>Cell-cell junction, integral</i>                               | C      | 3                | OBSCN:NM_001098623:exon16:c.G4801A:p.A1601T,OBSCN:NM_052843:exon16:c.G4801A:p.A1                                                     | 2/4                                                              | 3/3                     | <i>No</i>                      |

|                |                                                                                                                                        |        |   |                                                                                                                                     |     |     |           |
|----------------|----------------------------------------------------------------------------------------------------------------------------------------|--------|---|-------------------------------------------------------------------------------------------------------------------------------------|-----|-----|-----------|
|                | <i>component of plasma membrane, Z disc</i>                                                                                            |        |   | 601T,OBSCN:NM_001271223:exon18:c.G5353A:p.A1785T                                                                                    |     |     |           |
|                |                                                                                                                                        | C      | 3 | OBSCN:NM_001098623:exon53:c.C13984T:p.R4662C,OBSCN:NM_052843:exon53:c.C13984T:p.R4662C,OBSCN:NM_001271223:exon64:c.C16855T:p.R5619C | 2/4 | 3/3 | No        |
|                |                                                                                                                                        | J      | 4 | OBSCN:NM_001098623:exon11:c.A3473T:p.H1158L,OBSCN:NM_052843:exon11:c.A3473T:p.H1158L,OBSCN:NM_001271223:exon12:c.A3749T:p.H1250L    | 0/1 | NA  | Unknown   |
|                |                                                                                                                                        | U      | 3 | OBSCN:NM_001098623:exon22:c.G6373T:p.A2125S,OBSCN:NM_052843:exon22:c.G6373T:p.A2125S,OBSCN:NM_001271223:exon26:c.G7498T:p.A2500S    | 3/4 | 1/5 | Yes       |
| <b>TNXB</b>    | <i>Extracellular matrix structural constituent, actin cytoskeleton organization, proteinaceous extracellular matrix, cell adhesion</i> | 2018-A | 4 | TNXB:NM_032470:exon8:c.T1298C:p.M433T,TNXB:NM_019105:exon39:c.T12005C:p.M4002T                                                      | 4/4 | 3/5 | Partially |
|                |                                                                                                                                        | G      | 5 | TNXB:NM_019105:exon24:c.C8192G:p.P2731R                                                                                             | 3/3 | 0/1 | Yes       |
|                |                                                                                                                                        | S      | 4 | TNXB:NM_019105:exon12:c.G444A:p.V1482M                                                                                              | NA  | 1/3 | Unknown   |
| <b>CTNNA3</b>  | <i>Adherens junction, cell adhesion, cytoplasm, cytoskeleton</i>                                                                       | I      | 3 | CTNNA3:NM_001127384:exon5:c.T478A:p.S160T,CTNNA3:NM_013266:exon5:c.T478A:p.S160T,CTNNA3:NM_001291133:exon6:c.T514A:p.S172T          | 1/1 | 3/5 | Yes       |
|                |                                                                                                                                        | W      | 3 | CTNNA3:NM_001127384:exon12:c.C1603T:p.R535C,CTNNA3:NM_013266:exon12:c.C1603T:p.R535C                                                | 2/2 | 1/5 | Yes       |
| <b>NTRK1</b>   | <i>Nerve growth factor signaling pathway, axon guidance, positive regulation of neuron projection development, plasma membrane</i>     | C      | 3 | NTRK1:NM_001012331:exon6:c.G631A:p.V211M,NTRK1:NM_002529:exon6:c.G631A:p.V211M,NTRK1:NM_001007792:exon7:c.G541A:p.V181M             | 3/4 | 1/3 | Yes       |
|                |                                                                                                                                        | T      | 3 | NTRK1:NM_001012331:exon14:c.C1792T:p.H598Y,NTRK1:NM_001007792:exon15:c.C1702T:p.H568Y,NTRK1:NM_002529:exon15:c.C1810T:p.H604Y       | 2/2 | 0/4 | Yes       |
|                |                                                                                                                                        | T      | 3 | NTRK1:NM_001012331:exon14:c.G1820T:p.G607V,NTRK1:NM_001007792:exon15:c.G1730T:p.G577V,NTRK1:NM_002529:exon15:c.G1838T:p.G613V       | 2/2 | 0/4 | Yes       |
| <b>PDE4DIP</b> | <i>Actin cytoskeleton organization, cytoplasm, centrosome</i>                                                                          | T      | 3 | PDE4DIP:NM_001002811:exon1:c.A322C:p.I108L                                                                                          | 2/2 | 0/4 | Yes       |
|                |                                                                                                                                        | W      | 3 | PDE4DIP:NM_001002811:exon1:c.C317T:p.A106V                                                                                          | 4/4 | 4/5 | No        |

**Supplemental Table 4:** Complete list of enriched Gene Ontology terms  $p < 0.01$  using DAVID. Input gene list was the combined Minor Allele Frequency (MAF)  $< 0.05$  gene list from all families (input  $n = 1161$ ). Default values in DAVID were used.

| Category         | Term                                                               | Count | %     | PValue | Genes                                                                                                                                                                                                                                                                                                                                                                                                                                                                         | Fold Enrichment | FDR  |
|------------------|--------------------------------------------------------------------|-------|-------|--------|-------------------------------------------------------------------------------------------------------------------------------------------------------------------------------------------------------------------------------------------------------------------------------------------------------------------------------------------------------------------------------------------------------------------------------------------------------------------------------|-----------------|------|
| GOTERM_MF_DIRECT | GO:0005089~Rho guanyl-nucleotide exchange factor activity          | 15    | 1.31  | 0.00   | FARP2, PLEKHG4, PLEKHG1, PLEKHG2, ARHGEF28, KALRN, FGD1, AKAP13, OBSCN, ALS2, EPS8L2, ARHGEF40, DOCK1, MCF2L2, SOS2                                                                                                                                                                                                                                                                                                                                                           | 3.35            | 0.12 |
| GOTERM_BP_DIRECT | GO:0007411~axon guidance                                           | 23    | 2.01  | 0.00   | VASP, NTRK1, EPHA5, SPTBN5, TENM2, UNC5A, BDNF, PTPRO, ANK3, SEMA3F, GLI3, ROBO1, SPTA1, KIF26A, GPC1, FEZ1, BOC, DVL1, APBB2, NCAM1, SLIT2, MATN2, SPTBN2                                                                                                                                                                                                                                                                                                                    | 2.47            | 0.27 |
| GOTERM_CC_DIRECT | GO:0005874~microtubule                                             | 36    | 3.14  | 0.00   | INVS, DNAH1, DNAH7, TUBAL3, DCTN1, DNAH6, IQGAP1, CAMSAP2, GOLGA2, TEK1, DVL1, KIF13B, TEK2, CEP170, KIF21B, FSD1, KIF1A, PCNT, DYNC2H1, DNAH14, MTUS2, KCNAB2, SHROOM1, HAUS5, EML2, DLG1, SYNJ1, KATNAL2, INCENP, KIF26A, KIFC1, FEZ1, EHHADH, TTLL11, EIF3A, GAS8                                                                                                                                                                                                          | 1.98            | 0.09 |
| GOTERM_BP_DIRECT | GO:0035023~regulation of Rho protein signal transduction           | 15    | 1.31  | 0.00   | FARP2, PLEKHG4, PLEKHG1, PLEKHG2, ARHGEF28, KALRN, FGD1, AKAP13, OBSCN, ALS2, DLC1, EPS8L2, ARHGEF40, MCF2L2, SOS2                                                                                                                                                                                                                                                                                                                                                            | 3.16            | 0.27 |
| GOTERM_BP_DIRECT | GO:0043547~positive regulation of GTPase activity                  | 55    | 4.80  | 0.00   | RGS1, DOCK8, KNDC1, SIPA1L3, RPGR, RGS5, AKAP13, RGS3, PLCE1, ARHGEF40, SBF1, MCF2L2, RGS6, AGFG2, PLEKHG1, PTGIR, VPS9D1, PLEKHG2, TSC2, NRG1, ARAP1, GMIP, ACAP1, OBSCN, ALS2, MADD, RAPGEF2, RIN1, DOCK1, SOS2, RGS18, SPTBN5, ARHGEF28, AGAP1, IQGAP1, RASAL3, KALRN, FGD1, SPTA1, EPS8L2, NCAM1, SRGAP2, SRGAP1, SPTBN2, NTRK1, FARP2, STARD13, EGF, DAB2IP, ARHGAP24, DLC1, TRIP10, RGS11, SIPA1, LAMTOR5                                                               | 1.66            | 0.27 |
| GOTERM_BP_DIRECT | GO:0032091~negative regulation of protein binding                  | 12    | 1.05  | 0.00   | GOLGA2, EPB41L5, FRMD7, DVL1, CCM2L, DTNBP1, TMC8, CAMK1, PPARA, NES, SORL1, DACT1                                                                                                                                                                                                                                                                                                                                                                                            | 3.59            | 0.32 |
| GOTERM_MF_DIRECT | GO:0019829~cation-transporting ATPase activity                     | 5     | 0.44  | 0.00   | ATP7B, ATP8A1, ATP13A4, ATP13A2, ATP13A3                                                                                                                                                                                                                                                                                                                                                                                                                                      | 10.73           | 0.28 |
| GOTERM_CC_DIRECT | GO:0036057~slit diaphragm                                          | 5     | 0.44  | 0.00   | TRPC6, KIRREL2, NPHS1, MAGI2, IQGAP1                                                                                                                                                                                                                                                                                                                                                                                                                                          | 10.66           | 0.17 |
| GOTERM_MF_DIRECT | GO:0008514~organic anion transmembrane transporter activity        | 6     | 0.52  | 0.00   | SLCO2B1, SLCO1A2, SLCO1B3, SLC22A31, MFSD10, SLC22A11                                                                                                                                                                                                                                                                                                                                                                                                                         | 7.36            | 0.28 |
| GOTERM_CC_DIRECT | GO:0005882~intermediate filament                                   | 17    | 1.48  | 0.00   | FLG, DSP, KRTAP13-4, KRT2, KRTAP26-1, KRTAP27-1, KRT79, KRT10, GFAP, KRT28, KRT37, PKP2, KRTAP6-1, SYNC, NES, KRT6A, PRPH                                                                                                                                                                                                                                                                                                                                                     | 2.57            | 0.17 |
| GOTERM_CC_DIRECT | GO:0030018~Z disc                                                  | 17    | 1.48  | 0.00   | PPP1R12A, SYNPO2, AHNK2, ATP2B4, SLC4A1, NEB, ANK3, ADRA1A, IGFN1, RYR3, MYPN, TTN, OBSCN, HRC, PDE4B, SYNC, CRYAB                                                                                                                                                                                                                                                                                                                                                            | 2.46            | 0.21 |
| GOTERM_MF_DIRECT | GO:0005096~GTPase activator activity                               | 30    | 2.62  | 0.00   | RGS18, RGS1, AGAP1, IQGAP1, RASAL3, KALRN, SIPA1L3, SYDE2, RGS5, RGS3, SRGAP2, SRGAP1, AGFG2, RGS6, STARD13, VPS9D1, DAB2IP, TSC2, ARAP1, GMIP, ARHGAP24, ACAP1, DLC1, TRIP10, RAPGEF2, RGS11, RIN1, DOCK1, SIPA1, TBC1D26                                                                                                                                                                                                                                                    | 1.85            | 0.45 |
| GOTERM_CC_DIRECT | GO:0005819~spindle                                                 | 17    | 1.48  | 0.00   | INVS, DIDO1, SPAG8, NUMA1, DCTN1, DCTN3, HEPACAM2, HAUS5, EML2, INCENP, KIFC1, NUP85, CLTCL1, ANKRD53, CEP170, E4F1, KBTBD8                                                                                                                                                                                                                                                                                                                                                   | 2.40            | 0.22 |
| GOTERM_BP_DIRECT | GO:0051056~regulation of small GTPase mediated signal transduction | 18    | 1.57  | 0.00   | STARD13, PLEKHG2, TSC2, ARAP1, GMIP, KALRN, SIPA1L3, FGD1, ARHGAP24, SYDE2, AKAP13, OBSCN, DLC1, TRIP10, SRGAP2, SRGAP1, SOS2, SIPA1                                                                                                                                                                                                                                                                                                                                          | 2.29            | 1.00 |
| GOTERM_BP_DIRECT | GO:0042060~wound healing                                           | 13    | 1.13  | 0.00   | DSP, ALOX15, CCM2L, FN1, NRG1, SCRIB, GLI3, DCBLD2, CNN2, NLRP6, PTK7, PPARA, KRT6A                                                                                                                                                                                                                                                                                                                                                                                           | 2.77            | 1.00 |
| GOTERM_CC_DIRECT | GO:0005737~cytoplasm                                               | 347   | 30.28 | 0.00   | RPL5, ANKLE1, MTRR, HDAC10, RGS1, ABCA12, BACH2, WDR87, ENDOV, TBK1, CYP2D7, MPRIP, PPP4R2, C7ORF31, FAM65C, PLCE1, TRIM26, RTTN, KIF21B, ADGB, SDS, BSX, KRT2, MTUS2, AFAP1, SCRIB, LCE1E, MAPK8IP2, EML2, PPP1R3G, INPP4B, KATNAL2, TEPI, FEZ1, ZSCAN26, WDPCP, TTLL11, FLYWCH1, ALPK2, PFN1, RIN1, TRIB2, KPRP, SPTBN5, PARBP, DHX8, PCDH15, C10RF198, AGAP1, XPC, IQGAP1, EVPL, EPB41L5, TESPA1, SPATA5L1, HLCS, XRR1A, DHX35, EPB41L2, AFMID, PLEK2, KCNN3, APOB, SPTBN2 | 1.13            | 0.27 |

|                      |                                                    |    |      |      |                                                                                                                                                                                                                                                                                                                                                                                                                                                                                                                                                                                                                                                                                                                                                                                                                                                                                                                                                                                                                                                                                                                                                                                                                                                                                                                                                                                                                                                                                                                                                                                                                                                                                                                                                                                                                                                                                                                                                                                                                                                                                                                       |      |      |
|----------------------|----------------------------------------------------|----|------|------|-----------------------------------------------------------------------------------------------------------------------------------------------------------------------------------------------------------------------------------------------------------------------------------------------------------------------------------------------------------------------------------------------------------------------------------------------------------------------------------------------------------------------------------------------------------------------------------------------------------------------------------------------------------------------------------------------------------------------------------------------------------------------------------------------------------------------------------------------------------------------------------------------------------------------------------------------------------------------------------------------------------------------------------------------------------------------------------------------------------------------------------------------------------------------------------------------------------------------------------------------------------------------------------------------------------------------------------------------------------------------------------------------------------------------------------------------------------------------------------------------------------------------------------------------------------------------------------------------------------------------------------------------------------------------------------------------------------------------------------------------------------------------------------------------------------------------------------------------------------------------------------------------------------------------------------------------------------------------------------------------------------------------------------------------------------------------------------------------------------------------|------|------|
|                      |                                                    |    |      |      | <p>VPS16, VASP, SRMS, SETDB1, PMM1, DNAH14, NFATC3, THAP11, BPIFB3, NDUFAF1, CPEB2, INVS, GPI, TENM1, ZCCHC11, MTMR12, TENM4, STAB2, FMN1, IKBKAP, STON2, SERPINA9, ECSIT, PTPRH, METTL11B, PFAS, LYST, LITAF, GLI3, ROBO1, AKAP12, AKAP13, TRIM6, DSTYK, KRT28, SH3PXD2A, KIF13B, TNKS1BP1, CD34, LRRC1, APOBEC1, CCDC116, RING1, IFT140, DUSP1, PARP2, STRBP, TMC8, BTN3A3, PPHLN1, PLIN4, RARA, STRAP, RAPGEF2, UMPS, CRYAB, CD44, LRRC15, AHCY, AHNK, ADCY2, AKAP3, FGD1, LCE2D, PRSS42, CAMKK2, LIMA1, ARVCF, ANKRD53, APBB2, CTNNA3, MAP4K5, PCNT, APOL3, RUNX1T1, FARP2, WWOX, SVIL, CASP8AP2, RFTN1, MBD2, DAB2IP, LILRB1, VWA3B, KRT10, FMO5, PSMB9, FAM200A, MYBBP1A, NEDD4, DLC1, TTC3, ALMS1, TRIP10, FAS, FILIP1, TACC2, CAMK1, INHA, DFNA5, TJP2, MPHOSPH6, NEUROG3, GPHB5, ERCC6L, MROH2B, ZBTB25, NCF2, ATN1, HDLBP, UBE3B, CDC14A, PARK2, SYDE2, STK10, RGS5, HELB, RGS3, PPIP5K1, TEK1, TEK2, SVEP1, TGM6, NEK3, ARHGEF40, ZNF322, PIAS3, USP8, RNF44, AGTPBP1, MAGI2, TSC2, FRMD4A, CHD1L, KRT74, LAX1, SDCBP2, ZNF318, MADD, ADAM8, ELMO3, SULT6B1, HOMEZ, DRC7, BHLHB9, TSACC, ANKRD11, SPATA2, FOXO3, RASAL3, CAMSAP2, KIAA0556, FBXO40, ATXN3, NPAT, ORC4, ATXN1, PDZD2, STK36, PLXNA1, E4F1, RHPN2, SRGAP2, CCDC141, SRGAP1, MCL1, FAM83A, ZFH3, COA1, SMURF2, BDNF, EPHX2, TNK2, ECD, FANCA, KLHL21, SSC5D, FBXO34, DNAJC13, TDRD6, MCC, EIF2S1, GFAP, PTPRE, DLG1, NASP, UBXN11, NACA, MAP3K19, BOD1L2, ACO1, NF2, NES, DDO1, ALAS1, DYRK2, NUMA1, USP32, MTCL1, EFCAB13, MCM10, GPHN, TTC28, SYNE1, HEBP1, PIDD1, SGCD, SIN3B, ZIC3, METTL10, MYADML2, CEP170, PRKG1, DACT1, BOK, GET4, TRIM67, DSP, OVGP1, TTC37, PPP1R12A, TRPC6, TBP, VPS13C, PPP2R5B, ARNT, NRG1, KCNAB2, SHROOM1, MUC5AC, TFDP3, EEF1D, EHHADH, BPI, GNB1L, CFAP54, DOCK1, FAN1, RGS18, KDM3A, DNAH1, DNAH7, TUBAL3, DCTN1, BRAT1, VPS4B, DNAH6, PALM3, MLLT1, PARD6B, DNPEP, KCTD20, ASB10, CLMN, ANKAR, RNF39, SH3BP4, NCAM1, EPS8L2, SLIT2, FSD1, NXF5, DCAF13, MDH1B, CDK11A, KDM4B, SPAG8, PPIL2, DYX1C1, USP21, MGA, AHNK2, DTNBP1, TPRKB, PDE4DIP, SSRP1, PTPN13, CTCFL, NELL1, CROCC, RGS11, LPIN1, EIF3A</p> |      |      |
| GOTERM_M<br>F_DIRECT | GO:0008236~serin<br>e-type peptidase<br>activity   | 11 | 0.96 | 0.00 | <p>CFD, ST14, TMPRSS7, TPSB2, GZMM, TPSG1, C1R, KLK5, PLG, PRSS3, HGFAC</p>                                                                                                                                                                                                                                                                                                                                                                                                                                                                                                                                                                                                                                                                                                                                                                                                                                                                                                                                                                                                                                                                                                                                                                                                                                                                                                                                                                                                                                                                                                                                                                                                                                                                                                                                                                                                                                                                                                                                                                                                                                           | 3.00 | 0.65 |
| GOTERM_C<br>C_DIRECT | GO:0016328~later<br>al plasma<br>membrane          | 10 | 0.87 | 0.00 | <p>CEACAM1, DLG1, KCNB1, MTCL1, ABCC6, PTPRO, DVL1, ANK3, IQGAP1, NKD2</p>                                                                                                                                                                                                                                                                                                                                                                                                                                                                                                                                                                                                                                                                                                                                                                                                                                                                                                                                                                                                                                                                                                                                                                                                                                                                                                                                                                                                                                                                                                                                                                                                                                                                                                                                                                                                                                                                                                                                                                                                                                            | 3.22 | 0.27 |
| GOTERM_C<br>C_DIRECT | GO:0005856~cytos<br>keleton                        | 36 | 3.14 | 0.00 | <p>TENM1, DRC7, MTCL1, EVPL, PPL, GPHN, FGD1, SYNE1, KIAA0556, CNN2, AKAP12, EPB41L5, SGCD, EPB41L2, TNKS1BP1, PLEK2, NPHP4, CTNNA3, TRIM67, DSP, VASP, FARP2, AFAP1, FRMD4A, KCNAB2, PTPN13, ARHGAP24, APBB1IP, UBXN11, FRMD7, TRIP10, FILIP1, NF2, RIN1, PFN1, TRIB2</p>                                                                                                                                                                                                                                                                                                                                                                                                                                                                                                                                                                                                                                                                                                                                                                                                                                                                                                                                                                                                                                                                                                                                                                                                                                                                                                                                                                                                                                                                                                                                                                                                                                                                                                                                                                                                                                            | 1.66 | 0.27 |
| GOTERM_B<br>P_DIRECT | GO:0015721~bile<br>acid and bile salt<br>transport | 7  | 0.61 | 0.00 | <p>SLC10A4, CEACAM1, SLC10A6, SLC10A2, SLC02B1, SLC01A2, SLC01B3</p>                                                                                                                                                                                                                                                                                                                                                                                                                                                                                                                                                                                                                                                                                                                                                                                                                                                                                                                                                                                                                                                                                                                                                                                                                                                                                                                                                                                                                                                                                                                                                                                                                                                                                                                                                                                                                                                                                                                                                                                                                                                  | 4.42 | 1.00 |

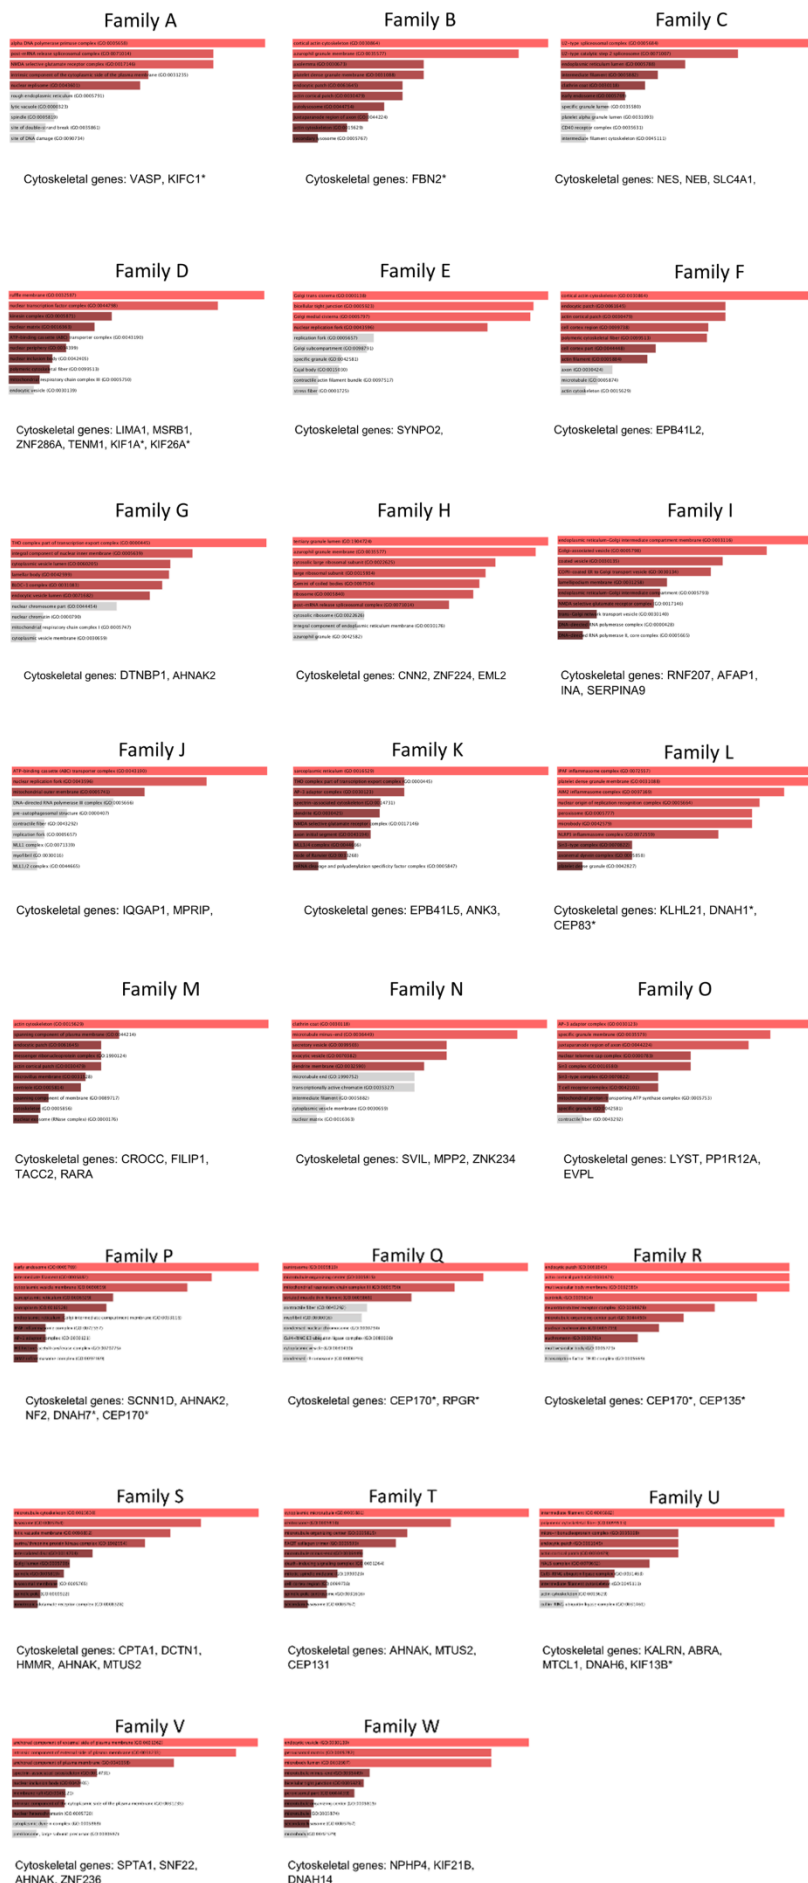

**Supplemental Figure 1:** Top enriched GO Cellular Component terms, by family, in order of descending p-value. Most families show an enrichment of cytoskeletal-related GO terms. Cytoskeletal genes containing variants within the family are also provided. Cytoskeletal genes were determined from the “cytoskeleton” GO term. Genes with a \* were manually annotated.



**Supplemental Table 5:** PCR primer sequences for genotyping. Families indicated with “2018” were published previously by our group (Baschal et al., 2018, PMID: 29930198).

| Gene                    | Family       | Primer Direction | Primer Seq                |
|-------------------------|--------------|------------------|---------------------------|
| <i>ANKRD11</i>          | H, S, 2018-E | Forward          | CCAGAGAGAGAAGGCAGTGG      |
|                         |              | Reverse          | GGGGATGTTTCCACCGTAGT      |
| <i>ANKRD11</i>          | C            | Forward          | AGACTTTCTTCCACGGGTTCC     |
|                         |              | Reverse          | CTCGGACCTCCTGCTGAAGT      |
| <i>COL21A1</i>          | P            | Forward          | TTAAGAATATGATGGTGCTAATGGA |
|                         |              | Reverse          | CTGGACCTGCTGTGAGTTTG      |
| <i>COL21A1</i>          | S            | Forward          | TTTTAATCCTCTGACACCTGGAC   |
|                         |              | Reverse          | TCACTTTTTCCCCTATTTTAAGCA  |
| <i>COL6A5</i>           | 2018-B       | Forward          | CACTCCACTGACCTCCACCT      |
|                         |              | Reverse          | AGAACCTGCCACATAGTAAACACTC |
| <i>COL6A5</i>           | C            | Forward          | TATGAAGATTGGCAGGAAGGATT   |
|                         |              | Reverse          | CTGACTCCACACCAAGCATTT     |
| <i>COL6A5</i>           | H            | Forward          | CTGATATACACTTAACACCAGCACA |
|                         |              | Reverse          | GCCTCTTCCACTTCATCCTC      |
| <i>FGD1</i>             | E, J         | Forward          | CTCTCCTGACTATCCCTTCCTGT   |
|                         |              | Reverse          | GTGCAGATTGGTGTTTGTGG      |
| <i>NPHP4</i>            | 2018-A       | Forward          | ACGAGTGAACAAAGAAGGTCAAA   |
|                         |              | Reverse          | ACACGCCCGAGAATAATAAACTCC  |
| <i>NPHP4</i>            | O            | Forward          | AGGAGTGGGAGAGAGAAGTCAAA   |
|                         |              | Reverse          | GCGATGCTTGTGGAGAAATG      |
| <i>NPHP4</i>            | W            | Forward          | ACCTCTCACCCACCACTCAC      |
|                         |              | Reverse          | AGCTCCCACCTGTCTCTCAA      |
| <i>OBSCN</i><br>(var 1) | C            | Forward          | TACAAGGACGGAAGAACTG       |
|                         |              | Reverse          | TACCAGACATTCAACAACAGCAC   |
| <i>OBSCN</i><br>(var 2) | C            | Forward          | CTTGGTGAGTTGCTTCATTGG     |
|                         |              | Reverse          | CCCTGAGAGAGCCTGTGAGA      |
| <i>OBSCN</i>            | J            | Forward          | GTGGGTTTATGTCTCTCATCAGC   |
|                         |              | Reverse          | CTTTCTGACTTTGTGAACTGTGG   |
| <i>OBSCN</i>            | U            | Forward          | GGTTCTAAAGGCGGTGGTCT      |
|                         |              | Reverse          | AGGAGGAGGTGGGAAGAGAAA     |
| <i>TNXB</i>             | 2018-A       | Forward          | CATCAGTCTCCATGTCGCAAAAC   |
|                         |              | Reverse          | ATCTCCTCTTCCTGCTTTCCC     |
| <i>TNXB</i>             | G            | Forward          | GAGAAAGCAACATCTTCTAGGGC   |
|                         |              | Reverse          | ACCTGGCATCCTCTCTATATCTC   |
| <i>TNXB</i>             | S            | Forward          | GGACTATGAAGGAGTCAAACCTGG  |
|                         |              | Reverse          | TTTACATCAAAACCATCATGCGG   |
